# Supplementary material for: Supramolecular architecture of tetrathiafulvalene-bridged bis(β-cyclodextrin) with porphyrin and its electron transfer behaviors
Source: Royal Society of Chemistry journal article supplement (doi:10.1039/c0pp00224k), 2010-11-01
Supplement: c0pp00224k.pdf [file c0pp00224k.pdf]

## **Supplementary Information**

# **Supramolecular Architecture of Tetrathiafulvalene Bridged Bis( $\beta$ -Cyclodextrin) with Porphyrin and Its Photophysical Behaviors**

Ying-Ming Zhang, Yong Chen, Rui-Jie Zhuang, Yu Liu\*

*Department of Chemistry, State Key Laboratory of Elemento-Organic Chemistry, Nankai  
University, Tianjin, 300071, P. R. China*

yuliu@nankai.edu.cn

**Table of Contents.**

|                                                 |    |
|-------------------------------------------------|----|
| <sup>1</sup> H NMR spectrum of <b>3</b> .....   | S3 |
| <sup>13</sup> C NMR spectrum of <b>3</b> .....  | S3 |
| MALDI-TOF spectrum of <b>3</b> .....            | S4 |
| 2D NOESY spectrum of <b>3</b> .....             | S4 |
| <sup>1</sup> H NMR titration of <b>3</b> .....  | S5 |
| Job's plot of the <b>3/4</b> system.....        | S5 |
| 2D ROESY spectrum of <b>3/4</b> complex.....    | S6 |
| TEM and AFM images of the linear assembly ..... | S7 |

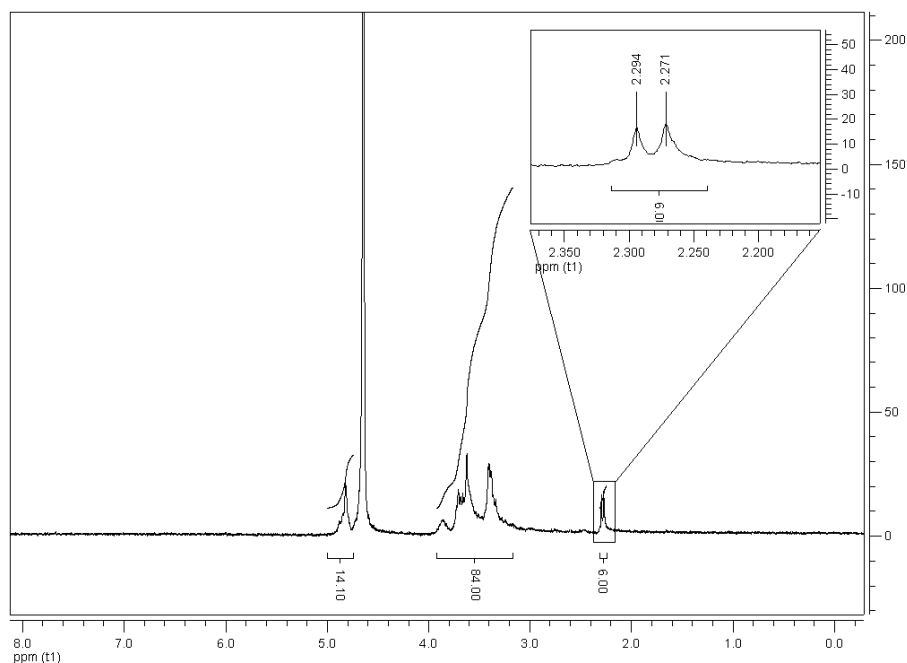

Figure S1.  $^1\text{H}$  NMR (400 MHz,  $\text{D}_2\text{O}$ , ppm) spectrum of **3**. Inset: Magnified area of  $-\text{SCH}_3$  protons.

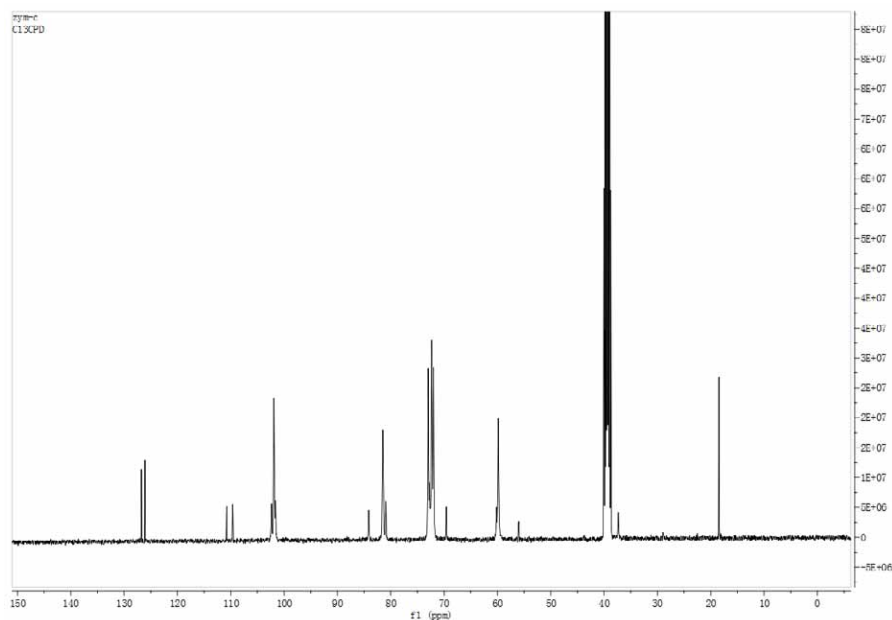

Figure S2.  $^{13}\text{C}$  NMR (100 MHz,  $\text{DMSO}-d_6$ , ppm) spectrum of **3**.

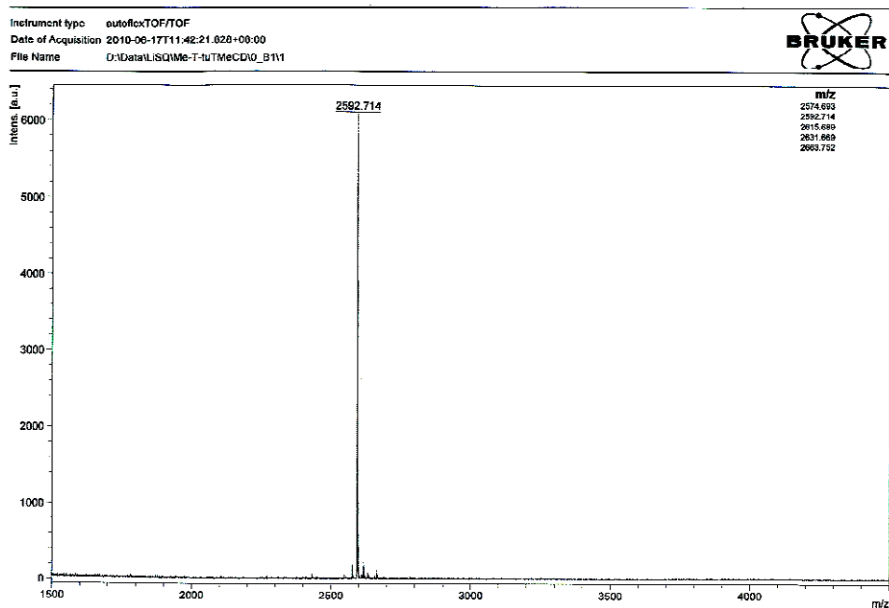

Figure S3. MALDI-TOF spectra of **3**.

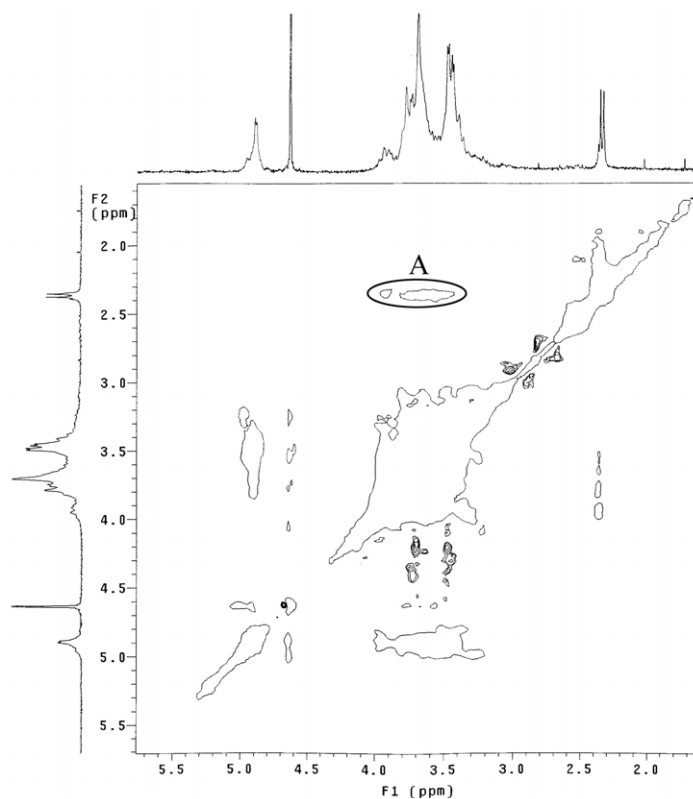

Figure S4. 2D NOESY spectrum (300 MHz) of **3** ( $[3] = 1.0 \times 10^{-3}$  M) in  $D_2O$  at 25 °C. Peaks A

corresponded to the NOE cross-peaks between -SCH<sub>3</sub> and CDs.

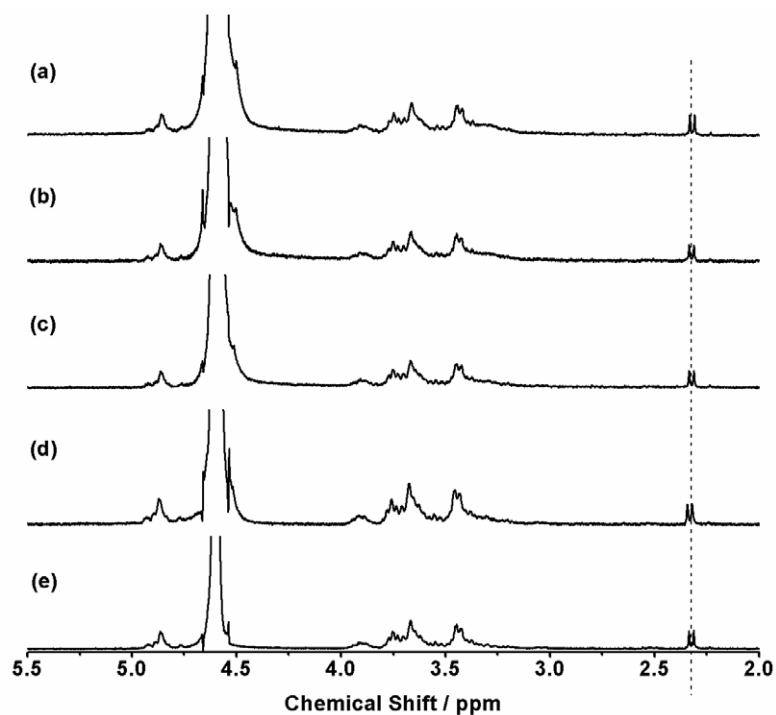

Figure S5. <sup>1</sup>H NMR titration of **3** ( $3.1\text{--}9.5 \times 10^{-4}$  M, from a to e) in D<sub>2</sub>O at 25 °C.

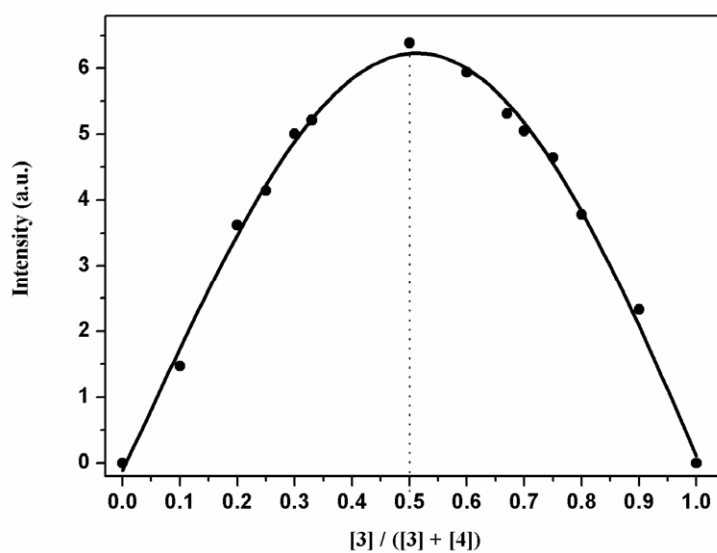

Figure S6. Job's plot of the **3/4** system in NaH<sub>2</sub>PO<sub>4</sub>-Na<sub>2</sub>HPO<sub>4</sub> buffer solution (pH 7.2) at 643 nm.

([**3**] + [**4**] =  $1 \times 10^{-5}$  M,  $\lambda_{\text{ex}} = 422$  nm).

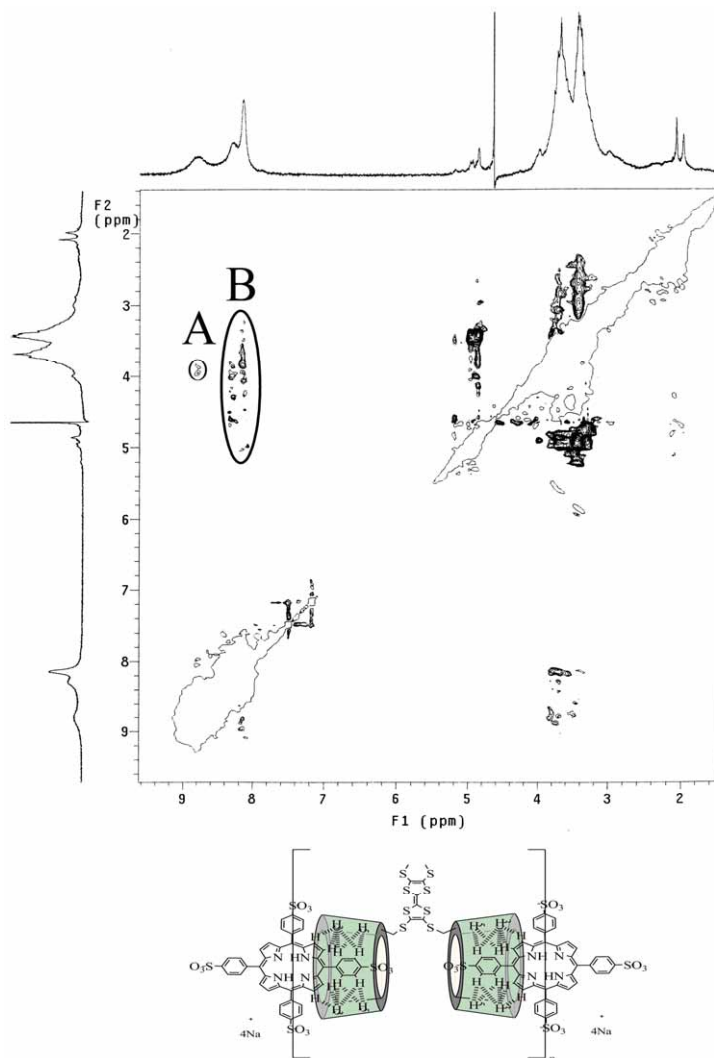

Figure S7. 2D ROESY spectrum (300 MHz) of a mixture of **3** and **4** ([**3**] = [**4**] =  $1.0 \times 10^{-3}$  M) in D<sub>2</sub>O at 25 °C. Peaks A and B corresponded to the NOE cross-peaks between porphyrins and CDs.

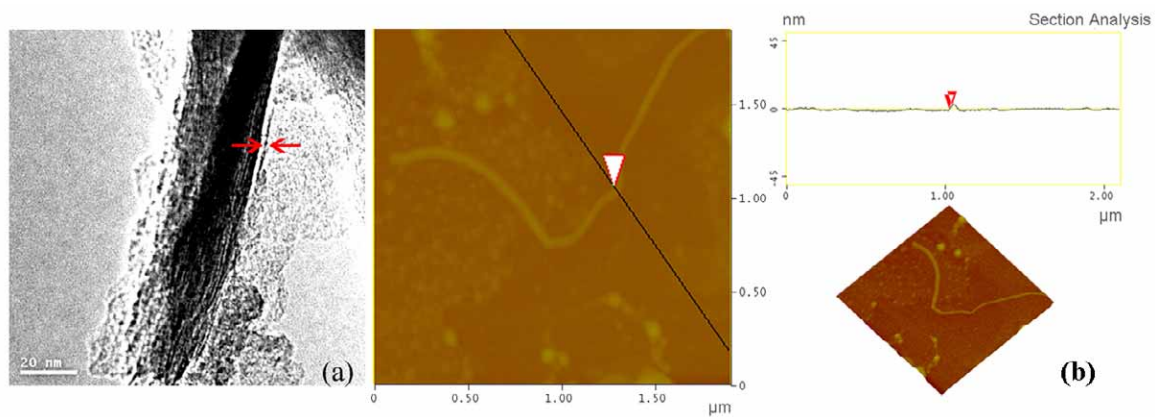

Figure S8. TEM (a) and AFM (b) images of the linear assembly.
